# Supplementary material for: Obesity, Xenobiotic Intake and Antimicrobial-Resistance Genes in the Human Gastrointestinal Tract: A Comparative Study of Eutrophic, Overweight and Obese Individuals
Source: PubMed Central journal article supplement (PMC6562451; doi:10.3390/genes10050349), 2019-05-07
Supplement: genes-10-00349-s001.pdf [file genes-10-00349-s001.pdf]

**SUPPLEMENTARY INFORMATION**

**Table S1.** Primers used in this study for screening of antimicrobial resistance genetic markers (ARG).

| <b>Target</b>                 | <b>Primer sequence (5' – 3')</b>                                       | <b>Amplicon (bp)</b> | <b>Reference</b>                                                  |
|-------------------------------|------------------------------------------------------------------------|----------------------|-------------------------------------------------------------------|
| <i>bla</i> <sub>CTX-M</sub>   | ATGTGCAGYACCAGTAAAG<br>GGTCACCAGAAGGAGC                                | 562                  | <i>Antimicrob Agents Chemother</i><br>2009; <b>53</b> : 465-475   |
| <i>bla</i> <sub>KPC</sub>     | ATGTCACTGTATCGCCGTCT<br>TTTTCAGAGCCTTACTGCC                            | 892                  | <i>Antimicrob Agents Chemother</i><br>2009; <b>53</b> : 465-475   |
| <i>bla</i> <sub>SHV</sub>     | CTTTACTCGCCTTTATCGGC<br>TTACCGACCGGCATCTTTCC                           | 982                  | <i>Antimicrob Agents Chemother</i><br>2009; <b>53</b> : 465-475   |
| <i>bla</i> <sub>TEM</sub>     | GTGCGCGGAACCCCTATT<br>TTACCAATGCTTAATCAGTGAGGC                         | 968                  | <i>Antimicrob Agents Chemother</i><br>2009; <b>53</b> : 465-475   |
| <i>bla</i> <sub>OXA-23</sub>  | GATCGGATTGGAGAACCAGA<br>ATTTCTGACCGCATTTCCAT                           | 501                  | <i>Int J Antimicrob Agents</i><br>2006; <b>27</b> : 351-353       |
| <i>bla</i> <sub>OXA-51</sub>  | TAATGCTTTGATCGGCCTTG<br>TGGATTGCACCTTCATCTTGG                          | 353                  | <i>Int J Antimicrob Agents</i><br>2006; <b>27</b> : 351-353       |
| <i>bla</i> <sub>OXA-24</sub>  | GGTTAGTTGGCCCCCTTAAA<br>AGTTGAGCGAAAAGGGGATT                           | 246                  | <i>Int J Antimicrob Agents</i><br>2006; <b>27</b> : 351-353       |
| <i>bla</i> <sub>OXA-143</sub> | TGGCACTTTCAGCAGTTCCT<br>TAATCTTGAGGGGGCCAACC                           | 149                  | <i>Int J Antimicrob Agents</i><br>2010; <b>35</b> : 305           |
| <i>bla</i> <sub>OXA-58</sub>  | AAGTATTGGGGCTTGTGCTG<br>CCCCTCTGCGCTCTACATAC                           | 599                  | <i>Int J Antimicrob Agents</i><br>2006; <b>27</b> : 351-353       |
| <i>bla</i> <sub>OXA-10</sub>  | TCTTTCGAGTACGGCATTAGC<br>CCAATGATGCCCTCACTTCC                          | 760                  | <i>J Antimicrob Chemother</i><br>2000; <b>46</b> : 703-711        |
| <i>bla</i> <sub>OXA-2</sub>   | GCCAAAGGCACGATAGTTG<br>GCGTCCGAGTTGACTGCCGG                            | 701                  | <i>Antimicrob Agents Chemother</i><br>2002; <b>46</b> : 3031-3034 |
| <i>bla</i> <sub>Z</sub>       | ACTTCAACACCTGCTGCTTTC<br>TGACCACTTTTATCAGCAACC                         | 173                  | <i>Antimicrob Agents Chemother</i><br>2000; <b>44</b> : 231-238   |
| <i>cfxA/cfxA2</i>             | CGTAGTTTTGAGTATAGCTTT<br>GATGTTGCCTATATATGTC                           | 802                  | <i>J Antimicrob Chemother</i><br>2003; <b>51</b> : 1293-1296      |
| <i>ampC</i>                   | ATAACCACCCAGTCACGC<br>CAGTAGCGGAGACTGCGCA                              | 630                  | <i>Clin Infect Dis</i><br>2002; <b>35</b> : 140-145               |
| <i>bla</i> <sub>SPM-1</sub>   | CCTACAATCTAACGGCGACC<br>TCGCCGTGTCCAGGTATAAC                           | 649                  | <i>J Antimicrob Chemother</i><br>2003; <b>52</b> : 699-702        |
| <i>cfiA</i>                   | TCCATGCTTTTCCCTGTCGAGTTAT<br>GGGCTATGGCTTTGAAGTGC                      | 683                  | <i>J Med Microbiol</i><br>2004; <b>53</b> : 413-419               |
| <i>tet(A)</i>                 | GCTACATCCTGCTTGCCTTC<br>CATAGATCGCCGTGAAGAGG                           | 210                  | <i>Mol Cell Probes</i><br>2001; <b>15</b> : 209-215               |
| <i>tet(B)</i>                 | TTGGTTAGGGGCAAGTTTG<br>GTAATGGGCAATAACACCG                             | 659                  | <i>Mol Cell Probes</i><br>2001; <b>15</b> : 209-215               |
| <i>tet(E)</i>                 | AAACCACATCCTCCATACGC<br>AAA TAG GCC ACA ACC GTC AG                     | 278                  | <i>Mol Cell Probes</i><br>2001; <b>15</b> : 209-215               |
| <i>tet(K)</i>                 | GTA GCG ACA ATA GGT AAT AGT<br>GTA GTG ACA ATA AAC CTC CTA             | 360                  | <i>J Clin Microbiol</i><br>2003; <b>41</b> : 4089-4094            |
| <i>tet(L)</i>                 | TCG TTA GCG TGC TGT CAT TC<br>GTA TCC CAC CAA TGT AGC CG               | 267                  | <i>Mol Cell Probes</i><br>2001; <b>15</b> : 209-215               |
| <i>tet(M)</i>                 | AGT GGA GCG ATT ACA GAA<br>CAT ATG TCC TGG GGT GTC TA                  | 158                  | <i>J Clin Microbiol</i><br>2003; <b>41</b> : 4089-4094            |
| <i>tet(O)</i>                 | AGC GTC AAA GGG GAA TCA CTA TCC<br>CGG CGG GGT TGG CAA ATA             | 1723                 | <i>J Antimicrob Chemother</i><br>2000; <b>45</b> : 763-770        |
| <i>tet(Q)</i>                 | TTA TAC TTC CTC CGG CAT CG<br>ATC GGT TCG AGA ATG TCC AC               | 904                  | <i>Mol Cell Probes</i><br>2001; <b>15</b> : 209-215               |
| <i>mrsA</i>                   | TCC AAT CAT AGC ACA AAA TC<br>AAT TCC CTC TAT TTG GTG GT               | 163                  | <i>Jpn J Infect Dis</i><br>2007; <b>60</b> : 183-187              |
| <i>mecA</i>                   | GTA GAA ATG ACT GAA CGT CCG ATA A<br>CCA ATT CCA CAT TGT TTC GGT CTA A | 310                  | <i>J Clin Microbiol</i><br>2004; <b>42</b> : 4947-4955            |
| <i>mef</i>                    | AGT ATC ATT AAT CAC TAG TGC                                            | 348                  | <i>Jpn J Infect Dis</i>                                           |

|                  |                                                                                |     |                                                                   |
|------------------|--------------------------------------------------------------------------------|-----|-------------------------------------------------------------------|
|                  | TTC TTC TGG TAC AAA AGT GG                                                     |     | 2007; <b>60</b> : 183-187                                         |
| <i>ereA</i>      | AAC ACC CTG AAC CCA AGG GAC G<br>CTT CAC ATC CGG ATT CGC TCG A                 | 420 | <i>Antimicrob Agents Chemother</i><br>1996; <b>40</b> : 1817-1824 |
| <i>ereB</i>      | AGA AAT GGA GGT TCA TAC TTA CCA<br>CAT ATA AAT CAT CAC CAA TGG CA              | 546 | <i>Antimicrob Agents Chemother</i><br>1996; <b>40</b> : 1817-1824 |
| <i>mphA</i>      | AAC TGT ACG CAC TTG C<br>GGT ACT CTT CGT TAC C                                 | 837 | <i>Antimicrob Agents Chemother</i><br>1996; <b>40</b> : 1817-1824 |
| <i>ermA</i>      | AAG CGG TAA ACC CCT CTG A<br>TTC GCA AAT CCC TTC TCA AC                        | 190 | <i>J Clin Microbiol</i><br>2003; <b>41</b> : 4089-4094            |
| <i>ermB</i>      | CTA TCT GAT TGT TGA AGA AGG ATG AAA<br>GTT TAC TCT TGG TTT AGG ATG AAA         | 142 | <i>J Antimicrob Chemother</i><br>2000; <b>46</b> : 527-534        |
| <i>ermC</i>      | AAT CGT CAA TTC CTG CAT GT<br>TAA TCG TGG AAT ACG GGT TTG                      | 299 | <i>J Clin Microbiol</i><br>2003; <b>41</b> : 4089-4094            |
| <i>qnrB</i>      | GAT CGT GAA AGC CAG AAA GG<br>ATG AGC AAC GAT GCC TGG TA                       | 476 | <i>Antimicrob Agents Chemother</i><br>2009; <b>53</b> : 639-645   |
| <i>qnrS</i>      | GCA AGT TCA TTG AAC AGG GT<br>TCT AAA CCG TCG AGT TCG GCG                      | 428 | <i>Antimicrob Agents Chemother</i><br>2009; <b>53</b> : 639-645   |
| <i>sul1</i>      | ATG GTG ACG GTG TTC GGC ATT CTG A<br>CTA GGC ATG ATC TAA CCC TCG GTC T         | 815 | <i>J Antimicrob Chemother</i><br>2003; <b>52</b> : 1022-1024      |
| <i>sul2</i>      | CCT GTT TCG TCC GAC ACA GA<br>GAA GCG CAG CCG CAA TTC AT                       | 396 | <i>Int J Antimicrob Agents</i><br>2011; <b>37</b> : 230-234       |
| <i>sul3</i>      | GAG CAA GAT TTT TGG AAT CG<br>CAT CTG CAG CTA ACC TAG GGC TTT GGA              | 396 | <i>J Antimicrob Chemother</i><br>2003; <b>52</b> : 1022-1024      |
| <i>nim1</i>      | ATG TTC AGA GAA ATG CGG CGT AAG CG<br>GCT TCC TTG CCT GTC ATG TGC TC           | 458 | <i>J Clin Microbiol</i><br>1996; <b>34</b> : 2078-2084            |
| <i>nim2</i>      | ATG TTC AGA GAA ATG CGG CGT AAG CG<br>GCT TCC TTG CCT GTC ATG TGC TC           | 458 | <i>J Clin Microbiol</i><br>1996; <b>34</b> : 2078-2084            |
| <i>nim3</i>      | ATG TTC AGA GAA ATG CGG CGT AAG CG<br>GCT TCC TTG CCT GTC ATG TGC TC           | 458 | <i>J Clin Microbiol</i><br>1996; <b>34</b> : 2078-2084            |
| <i>nim4</i>      | ATG TTC AGA GAA ATG CGG CGT AAG CG<br>GCT TCC TTG CCT GTC ATG TGC TC           | 458 | <i>J Clin Microbiol</i><br>1996; <b>34</b> : 2078-2084            |
| <i>aacA-aphD</i> | TAA TCC AAG AGC AAT AAG GGC<br>GCC ACA CTA TCA TAA CCA CTA                     | 227 | <i>J Clin Microbiol</i><br>2003; <b>41</b> : 4089-4094            |
| <i>vatA</i>      | TGG TCC CGG AAC AAC ATT TAT<br>TCC ACC GAC AAT AGA ATA GGG                     | 268 | <i>J Clin Microbiol</i><br>2003; <b>41</b> : 4089-4094            |
| <i>vatB</i>      | GCT GCG AAT TCA GTT GTT ACA<br>CTG ACC AAT CCC ACC ATT TTA                     | 136 | <i>J Clin Microbiol</i><br>2003; <b>41</b> : 4089-4094            |
| <i>vatC</i>      | AAG GCC CCA ATC CAG AAG AA<br>TCA ACG TTC TTT GTC ACA ACC                      | 467 | <i>J Clin Microbiol</i><br>2003; <b>41</b> : 4089-4094            |
| <i>vga</i>       | CCG AAC TGC TAT TAG CAG A<br>AAG TTC GTT TCT CTT TTC GA                        | 470 | <i>Antimicrob Agents Chemother</i><br>1999; <b>43</b> : 1062-1066 |
| <i>vgb</i>       | ACT AAC CAA GAT ACA CAG GAC C<br>TTA TTG CTT GTC AGC CTT CC                    | 734 | <i>Antimicrob Agents Chemother</i><br>1999; <b>43</b> : 1062-1066 |
| <i>linA</i>      | GGT GGC TGG GGG GTA GAT GT<br>GCT TCT TTT GAA ATA CAT GG                       | 323 | <i>Antimicrob Agents Chemother</i><br>1996; <b>40</b> : 1817-1824 |
| <i>mrsB</i>      | TAT GAT ATC CAT AAT AAT TAT CCA ATC<br>AAG TTTA TAT CAT GAA TAG ATT GTC CTG TT | 334 | <i>Antimicrob Agents Chemother</i><br>1999; <b>43</b> : 1062-1066 |
| <i>cepA</i>      | TTT CTG CTA TGT CCT GCC C<br>ATC TTT CAC GAA GAC GGC                           | 743 | <i>Clinics</i><br>2011; <b>66</b> : 543-547                       |
| <i>mexB</i>      | GTG TTC GGC TCG CAG TAC TC<br>AAC CGT CGG GAT TGA CCT TG                       | 244 | <i>FEMS Microbiol Lett</i><br>2005; <b>243</b> : 125-131          |
| <i>mexD</i>      | CGA GCG CTA TTC GCT GC<br>CGA GCG CTA TTC GCT GC                               | 165 | <i>BMC Microbiol</i><br>2010; <b>10</b> :217                      |
| <i>mexF</i>      | GGC AGT TGC ACG TCG A<br>CGC CTG GTC ACC GAG GAA GAG T                         | 255 | <i>Apmis</i><br>2005; <b>113</b> : 187-196                        |
| <i>mexY</i>      | TAG TCC ATG GCT TGC GGG AAG C<br>CCG CTA CAA CGG CTA TCC CT                    | 250 | <i>FEMS Microbiol Lett</i><br>2005; <b>243</b> : 125-131          |

**Table S2.** Sequence of oligonucleotide probes used for fluorescence in situ hybridization.

| <b>Probe</b> | <b>Target</b>                     | <b>Sequence (5' – 3')</b> | <b>Formamide</b> | <b>Reference</b>                                           |
|--------------|-----------------------------------|---------------------------|------------------|------------------------------------------------------------|
| Bfrag998     | <i>Bacteroides fragilis</i>       | GTTTCCACATCATTCCACTG      | 30%              | <i>Syst Appl Microbiol</i><br>2003; <b>26</b> : 110-118    |
| Bfra602      | <i>Bacteroides fragilis</i> group | GAGCCGCAAACCTTCACAA       | 30%              | <i>Appl Environ Microbiol</i><br>1998; <b>64</b> : 3336    |
| ECO1167      | <i>Escherichia coli</i>           | GCATAAGCGTCGCTGCCG        | 40%              | <i>Syst Appl Microbiol</i><br>1995; <b>18</b> : 113-122    |
| Enc1259      | <i>Enterococcus</i> spp.          | GAAGTCGCGAGGCTAAGC        | 35%              | <i>Syst Appl Microbiol</i><br>2000; <b>23</b> : 563-572    |
| FUS664       | <i>Fusobacterium</i> sp.          | CTTGTAAGTTCCGCTACCTC      | 40%              | <i>Eur J Oral Sci</i><br>2004; <b>112</b> : 33-41          |
| PINT649      | <i>Prevotella intermedia</i>      | GCCGCCRCTGAASTCAGGCC      | 40%              | <i>Microbiology</i><br>2002; <b>148</b> : 1379-1387        |
| PNG675       | <i>Prevotella nigrescens</i>      | TCCGCTGCGCTGCGTGTA        | 40%              | <i>Microbiology</i><br>2002; <b>148</b> : 1379-1387        |
| Pae997       | <i>Pseudomonas</i> sp.            | TCTGGAAAGTTCTCAGCA        | 35%              | <i>Syst Appl Microbiol</i><br>1995; <b>18</b> : 113-122    |
| KO218        | <i>Staphylococcus</i> sp.         | GAAGCAAGCTTCTCG TCCG      | 20%              | <i>J Microbiol Methods</i><br>2005; <b>62</b> : 37-56      |
| Str          | <i>Streptococcus</i> spp.         | CACTCTCCCCTTCTGCAC        | 30%              | <i>Med Microbiol Immunol</i><br>2000; <b>188</b> : 169-175 |
| ACA652       | <i>Acinetobacter</i> spp.         | ATCCTCTCCATACTCTA         | 35%              | <i>Appl Environ Microbiol</i><br>1994; <b>60</b> : 792-800 |

**Table S3.** Anthropometric and nutritional characteristics of the participants.

| Characteristics (mean $\pm$ SD)    | Groups of individuals |                        |                      | p < 0.05* |
|------------------------------------|-----------------------|------------------------|----------------------|-----------|
|                                    | Eutrophic<br>(n = 24) | Overweight<br>(n = 24) | Obese<br>(n = 24)    |           |
| Gender (male/female)               | 05/19                 | 12/12                  | 09/15                |           |
| Average age (years $\pm$ SD)       | 37.91 $\pm$ 12        | 38.12 $\pm$ 13.38      | 42.79 $\pm$ 11.67    |           |
| Average Body Mass Index            | 22.81 $\pm$ 01.8      | 27.05 $\pm$ 01.3       | 36.92 $\pm$ 06.0     | a,b,c     |
| Abdominal circumference            | 88.05 $\pm$ 7.4       | 94.65 $\pm$ 5.5        | 114.98 $\pm$ 15.3    | a,b,c     |
| Waist circumference                | 80.95 $\pm$ 06.7      | 88.70 $\pm$ 4.5        | 111.99 $\pm$ 16.6    | a,b,c     |
| Hip circumference                  | 99.60 $\pm$ 04.5      | 105.40 $\pm$ 4.30      | 117.45 $\pm$ 08.6    | a,b,c     |
| Waist-hip ratio                    | 0.81 $\pm$ 0.55       | 0.84 $\pm$ 0.52        | 0.97 $\pm$ 0.12      | a,b,c     |
| Mean daily calorie intake (kcal)   | 1 891.58 $\pm$ 679    | 2 018.79 $\pm$ 845     | 2 191.33 $\pm$ 1,049 | c         |
| Mean daily carbohydrate intake (%) | 53.60 $\pm$ 9.10      | 55.02 $\pm$ 7.78       | 57.43 $\pm$ 8.02     | c         |
| Mean daily lipids intake (%)       | 27.27 $\pm$ 8.79      | 29.87 $\pm$ 5.92       | 28.74 $\pm$ 5.60     | -         |
| Mean daily protein intake (%)      | 19.13 $\pm$ 4.30      | 15.11 $\pm$ 4.54       | 13.83 $\pm$ 3.27     | -         |
| Mean daily fibers intake (g)       | 23.75 $\pm$ 8.30      | 25.03 $\pm$ 13.30      | 30.49 $\pm$ 5.42     | b,c       |

\* Significant statistical analysis: *a*—comparison between eutrophic and overweight volunteers' values; *b*—comparison between overweight and obese volunteers' values; *c*—comparison between eutrophic and obese volunteers' values. SD = Standard Deviation

**Table S4.** Declaration of habitual intake of xenobiotic, other than antimicrobial drugs, as reported by the participants.

| Xenobiotics                | Habitual intake (%)                |                      |                  |
|----------------------------|------------------------------------|----------------------|------------------|
|                            | Eutrophic<br>(n=24)                | Overweight<br>(n=24) | Obese<br>(n= 24) |
| Antihypertensive           | 4.2                                | 12.5                 | 79.2             |
| Antacids                   | 0                                  | 0                    | 8.4              |
| Anti-inflammatories        | 0                                  | 4.2                  | 8.4              |
| Diuretic                   | 0                                  | 0                    | 4.2              |
| Barbiturates               | 0                                  | 0                    | 4.2              |
| Antidepressant             | 0                                  | 0                    | 4.2              |
| Hormone Drugs (Tamoxifen)  | 0                                  | 4.2                  | 0                |
| Contraceptional            | 0                                  | 4.2                  | 0                |
|                            | Whey protein                       | 4.2                  | 0                |
|                            | Glucosamine Sulfate                | 4.2                  | 0                |
| Nutritional<br>Supplements | Chondroitin sulfate                | 4.2                  | 0                |
|                            | Others                             | 8.4                  | 4.2              |
|                            | Sucralose and Acesulfame K         | 8.4                  | 8.4              |
|                            | Stevioside and cyclamate-saccharin | 0                    | 4.2              |
| Artificial<br>sweeteners   | cyclamate-saccharin                | 4.2                  | 8.4              |
|                            | Others                             | 0                    | 0                |
| Indeterminate              |                                    | 0                    | 4.2              |
